# Supplementary material for: Biosensor-Assisted Adaptive Laboratory Evolution for Violacein Production
Source: MDPI journal article supplement (doi:10.3390/ijms22126594), 2021-06-19
Supplement: s1 [file s1]

## Supplementary Information

### Biosensor-assisted adaptive laboratory evolution for violacein production

Da-ae Gwon, Joo Yeon Seok, Gyoo Yeol Jung, and Jeong Wook Lee

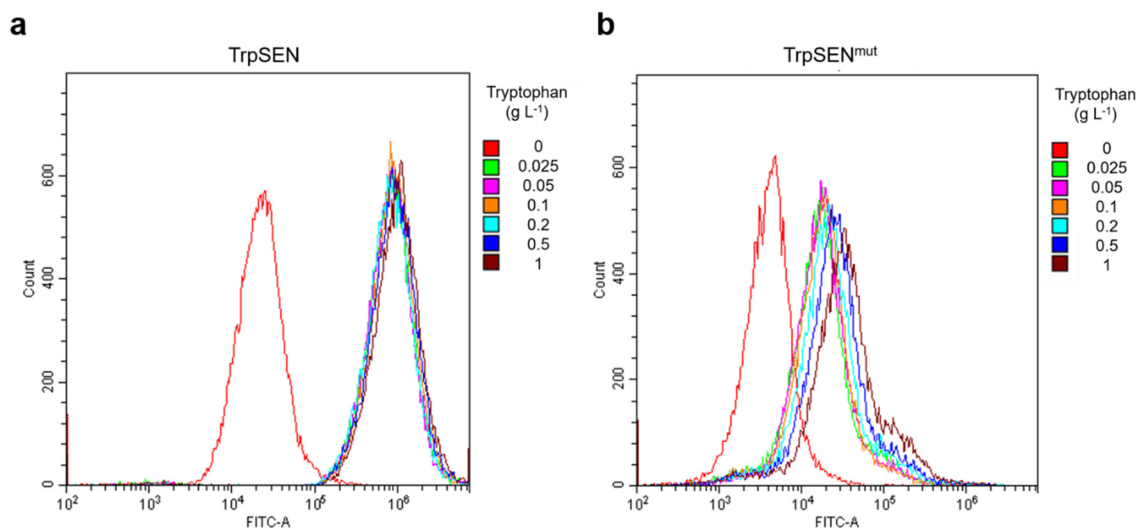

**Supplementary Figure S1.** FITC Histogram according to tryptophan concentration. (a) TrpSEN containing the wild-type *tnaC* (b) TrpSEN<sup>mut</sup> containing mutant *tnaC*

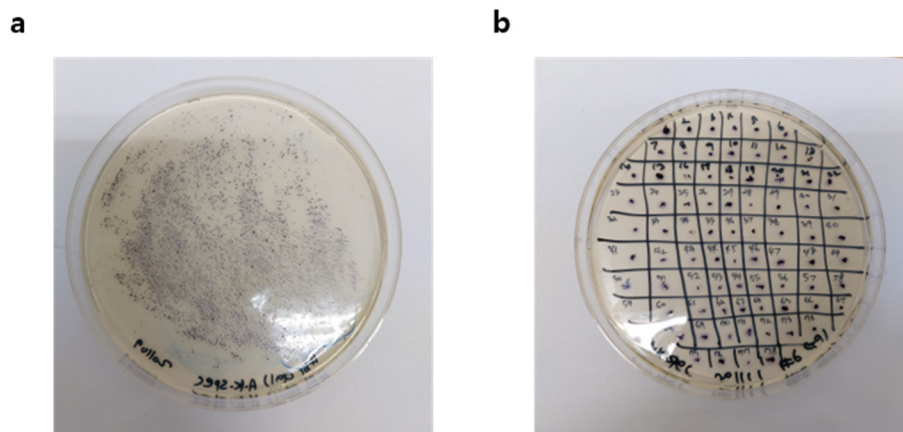

**Supplementary Figure S2.** Photo of colonies after transformation (a) Colonies after transformation of pVio into EPWSV2 (b) Among 70 colonies were selected
